# All-sky astrophysical component separation with Fast Independent Component Analysis (FASTICA)

D. Maino,<sup>1\*</sup> A. Farusi,<sup>2</sup> C. Baccigalupi,<sup>3</sup> F. Perrotta,<sup>4</sup> A. J. Banday,<sup>5</sup> L. Bedini,<sup>2</sup>  
C. Burigana,<sup>6</sup> G. De Zotti,<sup>4</sup> K. M. Górski<sup>7,8</sup> and E. Salerno<sup>2</sup>

<sup>1</sup>*Osservatorio Astronomico di Trieste, Via G. B. Tiepolo, 11, I-34131 Trieste, Italy*

<sup>2</sup>*IEI-CNR, Via Alfieri 1, I-56010 Ghezzano, Pisa, Italy*

<sup>3</sup>*SISSA/ISAS, Astrophysics Sector, Via Beirut, 4, I-34014 Trieste, Italy*

<sup>4</sup>*Osservatorio Astronomico di Padova, Vicolo dell' Osservatorio 5, I-35122 Padova, Italy*

<sup>5</sup>*MPA, Max Planck Inst. für Astrophysik, Karl-Schwarzschild Str. 1, D-85740 Garching, Germany*

<sup>6</sup>*ITeSRE-CNR, Via Gobetti, 101, I-40129 Bologna, Italy*

<sup>7</sup>*ESO, European Southern Observatory, Karl-Schwarzschild Str. 2, D-85740 Garching, Germany*

<sup>8</sup>*Warsaw University Observatory, Aleje Ujazdowskie 4, 00-478 Warszawa, Poland*

Accepted 2002 February 15. Received 2001 November 29; in original form 2001 September 3

## ABSTRACT

We present a new, fast, algorithm for the separation of astrophysical components superposed in maps of the sky. The algorithm, based on the Independent Component Analysis (ICA) technique, is aimed at recovering both the spatial pattern and the frequency scalings of the emissions from statistically independent astrophysical processes, present along the line-of-sight, from multi-frequency observations, without any a priori assumption on properties of the components to be separated, except that all of them, except possibly one, must have non-Gaussian distributions.

The analysis starts from very simple toy-models of the sky emission in order to assess the quality of the reconstruction when inputs are well known and controlled. In particular, we study the dependence of the results of separation conducted on and off the Galactic plane independently, showing that optimal separation is achieved for sky regions where components are smoothly distributed.

Then we consider simulated observations of the microwave sky with angular resolution and instrumental noise, supposed to be white and stationary, at the mean nominal levels for the *Planck* satellite. The angular response function is assumed to be identical at each frequency since this is, up to now, one of the Fast Independent Component Analysis (FASTICA) limitations. We consider several *Planck* observation channels containing the most important known diffuse signals: the cosmic microwave background (CMB), Galactic synchrotron, dust and free–free emissions. A method for calibrating the reconstructed maps of each component at each frequency has been devised. The spatial patterns of all the components have been recovered on all scales probed by the instrument. In particular, the CMB angular power spectra is recovered at the per cent level up to  $\ell_{\max} \approx 2000$ .

Frequency scalings and normalization have been recovered with better than 1 per cent precision for all the components at frequencies and in sky regions where their signal-to-noise ratio  $\geq 1.5$ ; the error increases at  $\sim 10$  per cent level for signal-to-noise ratios  $\approx 1$ .

Runs have been performed on a Pentium III 600-MHz computer; although the computing time slightly depends on the number of channels and components to be recovered, FASTICA typically took about 10 min for all-sky simulations with 3.5-arcmin pixel size.

Although the quoted results have been obtained under a number of simplifying assumptions, we conclude that FASTICA is an extremely promising technique for analysing the maps that will be obtained by the forthcoming high-resolution CMB experiments.

\*E-mail: maino@ts.astro.it

**Key words:** methods: data analysis – techniques: image processing – cosmic microwave background.

## 1 INTRODUCTION

NASA's *Microwave Anisotropy Probe (MAP)* satellite (Wright 1999) has begun its mission aimed at all-sky imaging of the last scattering surface of cosmic microwave (CMB) photons, at several frequencies and with high angular resolution. In 2007, the very early phase of our Universe will be probed with even higher sensitivity and angular resolution by ESA's *Planck* satellite (Mandolesi et al. 1998; Puget et al. 1998). In the meantime, new ground-based and balloon-borne experiments will provide improved maps of regions of the sky (see de Bernardis et al. 2002 and references therein). The main goal of these projects is to extract a map as accurate as possible of CMB anisotropies at all scales relevant for cosmology. This will allow us to determine the fundamental cosmological parameters with very high accuracy and to accurately test the models of structure formation.

Maps produced by these missions will contain not only the CMB signal but also contributions from different components placed between us and the last scattering surface. These consist of Galactic free-free, synchrotron, and thermal and spinning dust emissions of compact galactic and extragalactic sources as well as of the thermal and kinematic Sunyaev–Zeldovich effect in clusters of galaxies. Therefore, in order to exploit the wealth of cosmological and astrophysical information encoded in these maps, it is necessary to separate the different components with high accuracy and reliability.

A great deal of work in this direction has been carried out by several authors (de Oliveira-Costa & Tegmark 1999; Tenorio et al. 1999; Hobson et al. 1998, 1999; Baccigalupi et al. 2000; Stolyarov et al. 2001; Prunet et al. 2001) exploring different reconstruction techniques, from Wiener filtering and Maximum Entropy Method (MEM), both in real and Fourier space, to wavelets and neural networks.

Traditional methods (Wiener filtering and MEM) have been successfully applied to all-sky maps. They need the prior knowledge of the frequency dependence of the astrophysical components to be recovered, as well as of the power spectra of their spatial pattern. Recently, Stolyarov et al. (2001) have achieved a high-quality reconstruction of the various components using a MEM algorithm working in harmonic space, assuming prior knowledge of the frequency dependence and of the azimuthally averaged power spectrum of each input component except for the CMB. Computational requirements are quite demanding: the reconstruction requires 6 hr using 30 R10000 processors on an SGI Origin 2000 supercomputer and 14 Gb of RAM.

The Independent Component Analysis (ICA), based on a feed-forward neural network (Baccigalupi et al. 2000), works remarkably well without any a priori knowledge on the components, provided that they are statistically independent and all, except possibly one, have non-Gaussian distributions. This is actually the case because, at most, the distribution of CMB fluctuations is Gaussian, while foregrounds are all highly non-Gaussian. The main advantage of this approach is that the algorithm is able to learn how to reconstruct independent components and their frequency scalings from the input maps. This technique is very interesting for at least three reasons. First, as we show in this work, it is able to recover independent components

and their frequency dependencies with high accuracy also in the presence of instrumental noise. Secondly, it can be used as prior estimator for non-blind separation algorithms. Thirdly, a blind approach is necessary whenever reliable priors for the foreground emissions are not available, as in the case of CMB polarization. Baccigalupi et al. (2000) have applied this technique to small sky patches of  $15^\circ \times 15^\circ$ , without instrumental noise. In these ideal conditions, CMB is reconstructed with 1 per cent accuracy, weaker galactic components are recovered with  $\sim 10$  per cent error, while point sources are extracted down to a flux corresponding to  $\approx 0.7\sigma_{\text{CMB}}$ .

We present here the application of a new ICA method (FASTICA), proposed by Hyvärinen et al. (1998), to the problem of separating the various astrophysical components present in all-sky maps. This technique proved to be extremely fast: on a Pentium III 600 MHz PC, it took only  $\sim 10$  min to perform the component separation over the whole sky with  $\sim 3.5$ -arcmin resolution. Furthermore, and importantly, this technique also allows us to deal with the instrumental noise, at least as long as it can be approximated by a Gaussian distribution and is uniformly distributed over the sky.

This paper is organized as follows. In Section 2 we formalize the problem of component separation and list the assumptions we have made. Section 3 describes the FASTICA technique used in this work in detail. In Section 4 we study the quality of signal reconstruction with FASTICA for different kinds of toy models, i.e. when the input signals are well known and controlled. Section 5 deals with more realistic simulations of sky maps, focusing on the *Planck* satellite frequency channels and instrumental characteristics (noise and full width at half-maximum, FWHM). Finally, a discussion and the conclusions are presented in Section 6.

## 2 FORMALIZATION OF THE SOURCE SEPARATION PROBLEM

Let us consider the sky radiation as a function of direction  $\hat{r}$  and frequency  $\nu$ , and assume that it results from the superposition of signals coming from  $N$  different physical processes.

$$\tilde{x}(\hat{r}, \nu) = \sum_{j=1}^N \tilde{s}_j(\hat{r}, \nu) \quad (1)$$

where  $\tilde{x}$  is the total radiation from direction  $\hat{r}$  at frequency  $\nu$ , and  $\tilde{s}_j$  are the individual physical processes that form the total radiation.

The signal  $\tilde{x}$  is observed through a telescope, whose beam pattern can be modelled, at each frequency, as a shift-invariant point spread function  $B(\hat{r}, \nu)$ . For each value of  $\nu$ , the telescope de-focuses the physical radiation map by convolving it with the kernel  $B$ . The frequency-dependent convolved signal is input to an  $M$ -channel measuring instrument, which integrates the signal over frequency on each of its channels and adds some noise to its output. The final signal at the output of the measurement channel at frequency  $\nu$  is given by

$$x_\nu(\hat{r}) = \int B(\hat{r} - \hat{r}', \nu) \sum_{j=1}^N t_\nu(\nu') \tilde{s}_j(\hat{r}', \nu') d\hat{r}' d\nu' + \epsilon_\nu(\hat{r}), \quad (2)$$

where  $t_\nu(\nu')$  is the frequency response of the channel and  $\epsilon_\nu(\hat{r})$  is

the related noise map. To simplify the data model in equation (2), let us now make the following assumptions:

(i) Assumption 1.

Each source signal is a separable function of location and frequency:

$$\tilde{s}_j(\hat{r}, \nu) = \tilde{s}_j(\hat{r})f_j(\nu) \quad j = 1, \dots, N \quad (3)$$

(ii) Assumption 2.

$B(\hat{r}, \nu)$  is frequency-independent over each channel passband, i.e. for each frequency where  $t_i(\nu) \neq 0$  in the  $i$ th channel, the corresponding beam function  $B_i$  is the same. These two assumptions lead us to a new data model:

$$\begin{aligned} x_\nu(\hat{r}) &= \sum_{j=1}^N B_\nu(\hat{r}) * \tilde{s}_j(\hat{r}) \int t_\nu(\nu') f_j(\nu') d\nu' + \epsilon_\nu(\hat{r}) \\ &= B_\nu(\hat{r}) * \sum_{j=1}^N a_{\nu j} \tilde{s}_j(\hat{r}) + \epsilon_\nu(\hat{r}) \end{aligned} \quad (4)$$

where  $*$  denotes convolution, and

$$a_{\nu j} = \int t_\nu(\nu') f_j(\nu') d\nu'. \quad (5)$$

This data model can be further simplified by making another assumption.

(iii) Assumption 3.

The radiation pattern of the telescope is the same for all the measurement channels, that is, the function  $B(\hat{r}, \nu)$  is frequency independent:

$$B(\hat{r}, \nu) = B(\hat{r}). \quad (6)$$

In this case, equation (4) can be rewritten in vector form as:

$$\mathbf{x}(\hat{r}) = \mathbf{A}\tilde{\mathbf{s}}(\hat{r}) * B(\hat{r}) + \boldsymbol{\epsilon}(\hat{r}) = \mathbf{A}\mathbf{s}(\hat{r}) + \boldsymbol{\epsilon}(\hat{r}) \quad (7)$$

where each component,  $s_j$ , of the vector  $\mathbf{s}$  is given by the corresponding source function  $\tilde{s}_j$ , as defined in equation (3), convolved with the frequency-independent radiation pattern  $B$ . The matrix  $\mathbf{A}$  is the mixing matrix whose elements are the  $a_{\nu j}$  defined by equation (5).

We detailed this derivation to stress all the simplifying assumptions made. Depending on the particular astrophysical application, one or more of these assumptions might be not justified. Each of these cases needs to be addressed by a specific strategy. In the present simple case, we are just assuming that the noise is additive, signal-independent, white, Gaussian, and stationary. For example, it can be noted that, in principle, Assumption 3 is somewhat bad for applications where the instrument has different  $B_\nu$  at different frequencies, as it requires that higher resolution channels are degraded to the worst one.

Equation (7) establishes a point-wise linear data model for our problem, that is, it holds true independently for each direction  $\hat{r}$  or, likewise, for each pixel in the vector data map  $\mathbf{x}$ . At this point, our problem can be formulated as follows: with reference to the data model (equation 7), for each pixel  $p$  identified by a unit vector  $\hat{r}$ , estimate both the  $N$ -dimensional source vector  $\mathbf{s}$  and the  $M \times N$  mixing matrix  $\mathbf{A}$  from the  $M$ -dimensional data vector  $\mathbf{x}$ .

### 3 THE FASTICA ALGORITHM

The problem of estimating both  $\mathbf{A}$  and  $\mathbf{s}$  from  $\mathbf{x}$  via equation (7) is

unsolvable in the absence of additional information. The ICA approach assumes that

(i) the components of vector  $\mathbf{s}$  are independent random processes on the map domains;

(ii) the components of vector  $\mathbf{s}$ , save at most one, have non-Gaussian distributions.

In this section, we summarize an efficient strategy, described in detail in Hyvärinen & Oja (1997) and Hyvärinen (1999), to separate the independent components  $\mathbf{s}$ , exploiting these assumptions.

It has been proved (Comon 1994; Cardoso 1998) that if the components of  $\mathbf{s}$  (equation 7) are independent, a solution to our problem can be obtained by searching a transformation  $\mathbf{W}$  for the data vector  $\mathbf{x}$  such that the transformed vector  $\mathbf{y} = \mathbf{W}\mathbf{x}$  has independent components. We should thus find a measure of independence among the components of  $\mathbf{y}$  and maximize it for  $\mathbf{W}$ . Intuitively, an equivalent approach to achieve independence is to maximize non-Gaussianity. Indeed, as a result of the central limit theorem, a variable resulting from a mixture of independent variables is ‘more Gaussian’ than the original variables themselves. This means that finding a transformation such that the Gaussianity of the variables is reduced is equivalent to finding a set of transformed variables that are ‘more independent’ than the original ones. A strategy to find maximally non-Gaussian transformed variables is to select a suitable measure of non-Gaussianity and then maximize it for the transform operator  $\mathbf{W}$ . This approach can be shown to be equivalent to other theoretically sound approaches proposed in the literature (Comon 1994; Amari & Chichocki 1998; Cardoso 1998). Because equation (7) is a noisy model, it is necessary to find a measure of non-Gaussianity, via a suitably defined negative entropy, which allows us to adopt computing strategies that are robust against noise.

An approximation to the neg-entropy function has been proposed by Hyvärinen & Oja (2000) and Hyvärinen (1999) as a measure of non-Gaussianity for the transformed variables and, if the noise has the features assumed in the previous section and its covariance matrix is known, the Gaussian moments of  $\mathbf{y}$  are shown to be robust estimates of the desired function. It is possible to maximize non-Gaussianity by means of a Newton algorithm, after some preprocessing of the data. The rows of the transformation matrix  $\mathbf{W}$  can be estimated one by one, and a noise-robust estimate is achievable. This does not mean that by linearly transforming  $\mathbf{x}$  through  $\mathbf{W}$  we obtain a robust estimate of  $\mathbf{s}$ , especially in very noisy cases. To see this, with no loss of generality, we can assume  $M = N$ , and  $\mathbf{W}$  as a robust estimate of  $\mathbf{A}^{-1}$ . In this case, by applying  $\mathbf{W}$  to our data, we obtain

$$\mathbf{y} = \mathbf{W}(\mathbf{A}\mathbf{s} + \boldsymbol{\epsilon}) = \mathbf{s} + \mathbf{A}^{-1}\boldsymbol{\epsilon}. \quad (8)$$

The noise term  $\mathbf{A}^{-1}\boldsymbol{\epsilon}$  can strongly affect the high spatial frequency components of this solution, and thus some regularization strategy must normally be adopted to separate the source signals once  $\mathbf{W}$  has been estimated. We intentionally do not face this point in the present work, which is entirely dedicated to the study of the capabilities of FASTICA by itself.

Another general feature that one should keep in mind is that the quality of the estimated matrix  $\mathbf{W}$  becomes worse when one or more signals are much stronger than the others, even if the reconstructed spatial patterns of the independent components are still good. Indeed, suppose for simplicity that there is no noise, and only two frequency scalings and two independent components.

Then, from equation (8) it can be easily seen that at each output  $y_i$ , one has

$$y_i = (W_{i1}A_{11} + W_{i2}A_{21})s_1 + (W_{i1}A_{12} + W_{i2}A_{22})s_2. \quad (9)$$

If, for example,  $s_1 \gg s_2$ , then a good *spatial* reconstruction for which  $y_i$  is a copy of  $s_1$  can be achieved even in the case where the coefficients of  $s_1$  and  $s_2$  are comparable, or, in other words, the matrix  $\mathbf{W}$  is not a robust estimator of  $\mathbf{A}^{-1}$ .

The algorithm needs a preprocessing step (Hyvärinen 1999), where the data maps are ‘quasi whitened’. This step aims at reducing the number of unknowns with respect to the original problem. Let us suppose we know the covariance matrix  $\mathbf{\Sigma}$  of the system noise. The mean of the data at each frequency is removed (the offset of each independent component can be recovered in the end of the separation process, as we show below), and the covariance matrix  $\mathbf{C}$  of the zero mean data is calculated by simply evaluating the following expectation over the set of all available pixels:

$$\mathbf{C} = E\{\mathbf{x}\mathbf{x}^T\}. \quad (10)$$

The preprocessing procedure consists in evaluating a modified noise covariance and a quasi-whitened data set, respectively, as follows:

$$\hat{\mathbf{\Sigma}} = (\mathbf{C} - \mathbf{\Sigma})^{-1/2}\mathbf{\Sigma}(\mathbf{C} - \mathbf{\Sigma})^{-1/2}, \quad (11)$$

$$\hat{\mathbf{x}} = (\mathbf{C} - \mathbf{\Sigma})^{-1/2}\mathbf{x}. \quad (12)$$

The separation algorithm estimates the matrix  $\mathbf{W}$  row by row, thus permitting the recovery of the components one by one. Let  $\mathbf{w}$  be an  $M$ -dimensional vector whose dot-product by  $\hat{\mathbf{x}}$  gives a component of the transformed vector  $\mathbf{y} = \mathbf{W}\hat{\mathbf{x}}$  ( $\mathbf{w}^T$  is a row of matrix  $\mathbf{W}$ ). In order to find a noise-robust estimation of one such vector, we apply the following iterative algorithm, equipped with a suitable convergence criterion, where  $g$  is a regular non-quadratic function whose form can be chosen as  $g(u) = u^3$ ,  $g(u) = \tanh u$ ,  $g(u) = \exp(-u^2)$  for most problems (see Hyvärinen 1999), and  $g'$  is its first derivative.

- (i) Choose an initial vector  $\mathbf{w}$ ;
- (ii) update it through

$$\mathbf{w}_{\text{new}} = E\{\hat{\mathbf{x}}g(\mathbf{w}^T\hat{\mathbf{x}})\} - (I + \hat{\mathbf{\Sigma}})\mathbf{w}E\{g'(\mathbf{w}^T\hat{\mathbf{x}})\}$$

where  $E$  again denotes expectation over all the available samples;

- (iii) let

$$\mathbf{w}_{\text{new}} = \frac{\mathbf{w}_{\text{new}}}{\|\mathbf{w}_{\text{new}}\|}.$$

- (iv) Compare  $\mathbf{w}_{\text{new}}$  with the old one; if not converged, go back to (ii), if converged, begin another process.

This procedure maximizes the non-Gaussianity of the component  $\mathbf{w}^T\hat{\mathbf{x}}$ . Let us assume that a certain number,  $k$ , of rows of  $\mathbf{W}$  have been evaluated. To estimate the  $(k+1)$ th row, we must search it in the subspace orthogonal to the first  $k$  rows. To achieve this goal, an orthogonalization step (e.g. Gram-Schmidt) must be inserted between steps (ii) and (iii).

Once the separation matrix  $\mathbf{W}$  has been found, physical normalization, frequency scalings and offsets of each independent component in the data can in principle be reconstructed. Consider normalization and frequency scalings first: by simply inverting equation (8), we get

$$\mathbf{x} = \mathbf{W}^{-1}\mathbf{y}, \quad (13)$$

which means that the independent component  $x_\nu^{(j)}$  present in  $\mathbf{x}$  contributes to the signal at  $\nu$ th frequency:

$$x_\nu^{(j)}(\text{physical units at frequency } \nu) = (W^{-1})_{\nu j}y_j. \quad (14)$$

Then, the frequency scaling for the component  $j$  between frequencies  $\nu$  and  $\nu\text{armin}$  is given by

$$\frac{x_{\nu j}}{x_{\nu' j}} = \frac{(W^{-1})_{\nu j}}{(W^{-1})_{\nu' j}}. \quad (15)$$

The offsets can be recovered as follows. True input data can be written as the sum of zero mean component plus mean values, indicated as  $\mathbf{x}$  and  $\langle\mathbf{x}\rangle$ , respectively. The zero mean component is reconstructed as in equation (13), while the total signal obeys

$$\langle\mathbf{x}\rangle + \mathbf{x} = \mathbf{W}^{-1}(\mathbf{y} + \langle\mathbf{y}\rangle). \quad (16)$$

Then, by simply taking the mean of this expression, we get

$$\langle\mathbf{y}\rangle = \mathbf{W}\langle\mathbf{x}\rangle, \quad (17)$$

so that, at  $\nu$ th frequency, the offset of the independent component  $j$  is

$$\langle x_\nu^{(j)} \rangle (\text{physical units at frequency } \nu) = (W^{-1})_{\nu j} \langle y_j \rangle. \quad (18)$$

Furthermore we can derive the signal-to-noise ratio in the reconstructed map. As the system noise covariance matrix  $\mathbf{\Sigma}$  is assumed to be known, it is possible to build noise constrained realizations  $\mathbf{n}_x$  for each frequency channel. Once the matrix  $\mathbf{W}$  has been recovered, the corresponding noise realizations in the FASTICA outputs  $\mathbf{n}_y$  are

$$\mathbf{n}_y = \mathbf{W}\mathbf{n}_x. \quad (19)$$

The noise is then transformed like signals and an estimation of the noise into the reconstructed components is achievable. From the ‘processed’ noise it is straightforward to obtain the signal-to-noise ratio. This is a useful tool when, for example, the number of underlying components is not known a priori. Suppose, for example, that the number  $M$  of observing channels is larger than the number  $N$  of the underlying sky components. Using all the channels leads to the recovery of  $M$  ‘components’, the fictitious ones being characterized by a signal-to-noise ratio of the order of, or below, unity.

## 4 TOY SKY MODELS

In the next section we shall show FASTICA results on simulated skies which are not too far from what the *Planck* satellite should observe, including the instrumental noise. However, we prefer to approach that case gradually, inserting a section here which starts with highly idealized skies and ends just one step before the *Planck* case. We want to test the capabilities of the algorithm when components are well known and controlled, allowing a better understanding of the more realistic simulation of the next section.

### 4.1 Toy model I

In order to evaluate the ability of the FASTICA algorithm to separate independent sky components, we start with a very simple toy model, comprising only two components ( $N=2$ ) with different distributions without, for the moment, taking into account the instrumental noise. This toy sky model is then ‘observed’ at two frequencies, 53 and 90 GHz; therefore  $N=M$ . FASTICA is a

pointwise algorithm and we want to verify the dependence of the goodness of the reconstruction upon the total number of pixels in the maps, signal statistics and spatial distribution of the signal. We use sky maps pixelized according to the HEALPix scheme (Górski, Hivon & Wandelt 1998; Górski et al. 1999), and we start working with  $N_{\text{side}} = 64$ , corresponding to a pixel size of about  $1^\circ$ . Our sky emission model is composed of (i) a standard cold dark matter CMB sky normalized to *COBE* (CDM, flat geometry,  $\Omega_b = 0.05$ ,  $\Omega_{\text{CDM}} = 0.95$ ,  $h = 0.50$ , three massless neutrino families, scale-invariant Gaussian perturbations), which is a realization of a Gaussian process, smoothed with a  $7^\circ$  Gaussian beam; and (ii) a component, randomly distributed on the sky, with signal following a  $\chi^2$  distribution with one degree of freedom:

$$f_\chi(x) = \frac{x^{-1/2} e^{-x/2}}{2^{1/2} \Gamma(1/2)}, \quad (20)$$

where  $\Gamma$  is the Gamma function. The latter is highly non-Gaussian with a kurtosis (equation 23 below) of  $\geq 10000$ ; no beam smoothing has been applied to it. For the CMB we adopt a blackbody spectrum at  $T_{\text{CMB}} = 2.726$  K, while the  $\chi^2$  signal is assumed to have a constant antenna temperature. We have run two cases in which the rms signal of the latter component is, respectively,  $\sim 30$  and  $\sim 3$  times larger than the CMB at 90 GHz.

As mentioned in Section 3, there are three kinds of non-linear functions that approximate the neg-entropy: we have verified that in most cases the function  $g(u) = u^3$  works better than the other two, and therefore we adopt it for the following analysis. The goodness of the reconstruction is quantified in terms of four figures of merit: (1) the correlation coefficient

$$r_S(x_{\text{in}}, x_{\text{out}}) = \frac{E[(x_{\text{in}} - \bar{x}_{\text{in}})(x_{\text{out}} - \bar{x}_{\text{out}})]}{\sqrt{E[(x_{\text{in}} - \bar{x}_{\text{in}})^2]} \sqrt{E[(x_{\text{out}} - \bar{x}_{\text{out}})^2]}} \quad (21)$$

between the output and input data  $x_{\text{out}}, x_{\text{in}}$  [ $E$  again denotes the expectation value;  $\bar{x} = E(x)$  represents the mean value]; (2) the percentage error in the frequency scaling of the reconstructed signal; (3) the percentage errors on higher-order moments

$$\text{skewness} = \frac{E[(x - \bar{x})^3]}{E[(x - \bar{x})^2]^{3/2}}, \quad (22)$$

$$\text{kurtosis} = \frac{E[(x - \bar{x})^4]}{E[(x - \bar{x})^2]^2} - 3 \quad (23)$$

of the reconstructed signal; and (4) the relative residual after recalibration and subtraction of the corresponding input component. These figures of merit are also evaluated for a map with a higher number of pixels ( $N_{\text{side}} = 128$ ) and a higher angular resolution (smoothing with a  $1^\circ$  FWHM beam) of the CMB signal. As shown by Tables 1 and 2, the correlation between input and output signals is extremely tight for both components and does not vary as their intensity ratio changes by an order of magnitude. The correlation coefficient increases with increasing number of pixels.

The recovery of the frequency dependence of each component is also good and obviously improves when the component becomes relatively stronger (while the recovery of the frequency spectrum of the other component is degraded roughly by the same factor). This result can be understood by consideration of equation (9): even when the spatial correlation is extremely good, the matrix  $\mathbf{W}$  is not necessarily a robust estimator of  $\mathbf{A}^{-1}$ . In the case of the weaker component, better accuracy is achieved for higher angular resolution and a larger number of pixels.

The very accurate recovery of higher-order moments shows that the algorithm, at this level of simulation, does not introduce extra non-Gaussianity into the reconstructed signal.

Equation (14) allows us to convert the FASTICA output into physical units. The residuals after subtraction of the re-scaled output map from the input one, show a pattern that is exactly the one of the other component: there is a sort of ‘mirroring’ of one component into the other in the residuals. The level of residuals depends on  $N_{\text{side}}$  of the map; their rms values are about  $10^{-3}$  times smaller than the rms of the original map.

For fixed  $N_{\text{side}}$ , the quality of the reconstruction is significantly better in the case of the  $1^\circ$  resolution, thanks to the better sampling of the CMB statistics.

## 4.2 Toy model II

We now replace the unphysical  $\chi^2$  signal with dust emission, modelled scaling to 53 and 90 GHz, with the spectral shape of equation (27), the maps by Schlegel, Finkbeiner & Davies (1998). The CMB plus dust emission maps are then convolved with a Gaussian beam of  $1^\circ$  FWHM. We adopt  $N_{\text{side}} = 128$ . The main difference with the previous model is that now we have inserted a signal (dust emission) with a strong spatial structure. We have considered this foreground, at frequencies where Galactic

**Table 1.** Figures of merit for the reconstruction of the CMB, convolved with a  $7^\circ$  FWHM beam, and of a highly non-Gaussian signal ( $\chi^2$ ) for different values of  $N_{\text{side}}$ . The columns ‘moments’ report the larger relative error on skewness and kurtosis. Simulations with (without) \* have the  $\chi^2$  signal 3 (30) times stronger than the CMB. Residual are evaluated for the CMB signal only.

| $N_{\text{side}}$ | $r_S$ (per cent) |          | $\nu$ scaling (per cent) |                | moments (per cent) |             | Residuals               |
|-------------------|------------------|----------|--------------------------|----------------|--------------------|-------------|-------------------------|
|                   | CMB              | $\chi^2$ | CMB                      | $\chi^2$       | CMB                | $\chi^2$    |                         |
| 64                | $\geq 99.99$     | 99.79    | $\sim 3$                 | $\sim 10^{-4}$ | $\sim 0.01$        | $\sim 0.02$ | $\sim 5 \times 10^{-4}$ |
| 64*               | “                | “        | $\sim 0.35$              | $\sim 10^{-3}$ | “                  | “           | “                       |
| 128               | “                | 99.88    | $\sim 2$                 | $\sim 10^{-3}$ | $\sim 0.08$        | $\sim 0.01$ | $\sim 5 \times 10^{-3}$ |
| 128*              | “                | “        | $\sim 0.29$              | $\sim 10^{-2}$ | “                  | “           | “                       |

**Table 2.** Same as in Table 1, but for a  $1^\circ$  FWHM beam.

| $N_{\text{side}}$ | $r_S$ (per cent) |          | $\nu$ scaling (per cent) |                | moments (per cent) |              | residuals               |
|-------------------|------------------|----------|--------------------------|----------------|--------------------|--------------|-------------------------|
|                   | CMB              | $\chi^2$ | CMB                      | $\chi^2$       | CMB                | $\chi^2$     |                         |
| 128               | $\geq 99.99$     | 99.96    | $\sim 0.8$               | $\sim 10^{-3}$ | $\sim 0.4$         | $\sim 0.002$ | $\sim 2 \times 10^{-3}$ |
| 128*              | “                | “        | $\sim 0.09$              | $\sim 10^{-2}$ | “                  | “            | “                       |

**Table 3.** Figures of merit for the reconstruction of CMB and dust emission convolved with a Gaussian beam with  $1^\circ$  FWHM, for different Galactic latitude cuts. The † indicates a case in which the dust signal has been randomly distributed all over the sky. Residuals are evaluated only for the CMB map.

| $N_{\text{side}}$ | $b_{\text{cut}}$    | $r_s$ (per cent) |       | $\nu$ scaling (per cent) |              | moments (per cent) |             | residuals      |
|-------------------|---------------------|------------------|-------|--------------------------|--------------|--------------------|-------------|----------------|
|                   |                     | CMB              | dust  | CMB                      | dust         | CMB                | dust        |                |
| 128               | all sky             | $\sim 99.97$     | 76.46 | $\sim 22$                | $\sim 0.3$   | $\sim 6$           | $\sim 0.3$  | 0.02           |
| 128               | $ b  > 25^\circ$    | $\geq 99.99$     | 99.88 | $\sim 0.3$               | $\sim 4.5$   | $\sim 0.7$         | $\sim 0.15$ | 0.008          |
| 128               | $ b  \leq 25^\circ$ | $\sim 99.96$     | 97.67 | $\sim 11$                | $\sim 0.2$   | $\sim 0.3$         | $\sim 0.03$ | 0.02           |
| 128†              | all sky             | $\geq 99.99$     | 99.99 | $\sim 0.4$               | $\sim 0.001$ | $\sim 0.2$         | $\sim 0.06$ | $\sim 10^{-4}$ |

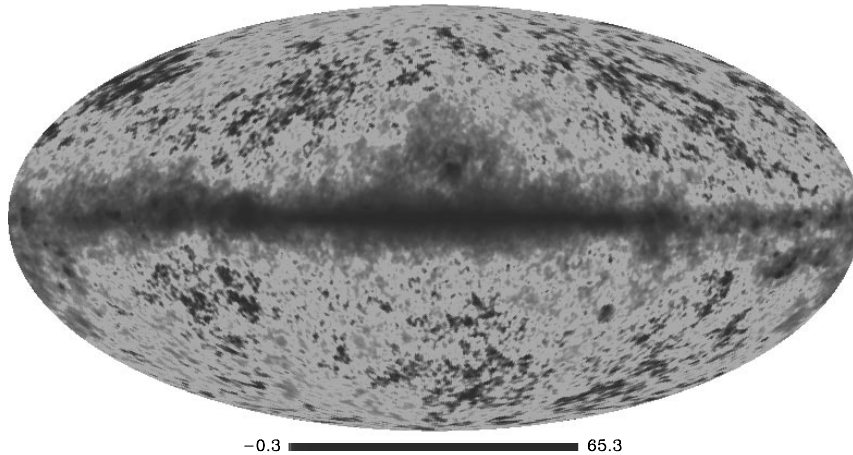

**Figure 1.** FASTICA reconstruction of the dust component (toy model II). The map is plotted in a non-linear scale to emphasize the high Galactic latitude structures, reflecting those of the CMB.

synchrotron and free–free emissions should dominate, because its spatial distribution is known at high resolution (6 arcmin) and we wanted to explore the effect of its markedly non-uniform sky distribution, highly concentrated on the Galactic plane.

The power-law function,  $g(u) = u^3$ , still works better than the others. A summary of the results, in terms of the usual figures of merit, is in Table 3. We note that, in the case of the all-sky analysis (first row of the table), while the reconstructed CMB map is very well correlated with the input one, this is not the case for the dust. A significant degradation of the reconstructed dust map is clearly visible in Fig. 1, representing the output dust map, showing some CMB spatial features at high Galactic latitudes. Furthermore, the derived frequency dependencies of both signal, but particularly that of the CMB, deviate significantly from the expected one. In addition, when the CMB map is converted into physical units, a residual map showing dust spatial structures is present with an rms only 50 times smaller than the CMB rms, which is much worse than the result we obtained in Section 4.1.

The main reason of these results is that the dust is highly non-uniformly distributed across the sky. Indeed, as noted above, the recovery of the frequency dependence, i.e. of the separation matrix, is poor if one component is much weaker than the other; the situation worsens if the ratio of the two components is strongly varying across the map, as is the case here: dust dominates on the Galactic plane, while the CMB dominates at high Galactic latitudes. In addition, dust has different statistics on and off the Galactic plane, as Table 4 shows. In order to check this point, we made an experiment separating CMB and an artificial ‘sky-uniform’ dust map generated by randomly distributing its signal over all the sky (simply randomly shuffling the pixels so that the Galactic plane structure is destroyed): the quality of the

**Table 4.** Skewness and kurtosis of dust emission and dust/CMB rms ratio for sky regions at low and high Galactic latitudes.

| $b_{\text{cut}}$    | Skewness | Kurtosis | dust/CMB |        |
|---------------------|----------|----------|----------|--------|
|                     |          |          | 53 GHz   | 90 GHz |
| $ b  > 25^\circ$    | 0.01     | -2.97    | 0.095    | 0.23   |
| $ b  \leq 25^\circ$ | 7.44     | 139.3    | 13.19    | 5.49   |

reconstructed maps becomes extremely good (fourth row in Table 3).

These simulations show that a better reconstruction can be achieved for uniformly distributed sky signals. In the present problem, this can be obtained by separately analysing regions around the Galactic plane and at high Galactic latitudes (second and third rows of Table 3), where the Galactic emission has very different spatial distributions (see Table 4).

#### 4.3 Effect of instrumental noise

We now add instrumental noise to the toy model considered in the previous subsection. The noise is assumed to be uniform across the sky and such that the average signal-to-noise ratio at high Galactic latitudes is  $\approx 2$ . Again, the all-sky reconstruction is unsatisfactory. However, if we analyse regions within  $|b| = 25^\circ$  and at higher Galactic latitudes separately, we recover the CMB frequency scaling with a 0.5 per cent error at high Galactic latitudes and that of dust emission with the same error at low latitudes. The signal-to-noise ratio at high Galactic latitudes is  $\approx 2$  for the CMB (as in the

input map) and  $\approx 1$  for dust. At low Galactic latitudes the signal-to-noise ratio is still  $\approx 2$  for the CMB, and  $\approx 12$  for dust emission.

## 5 FASTICA AND *PLANCK* SIMULATED MAPS

We simulate all-sky maps adopting the HEALPix pixelization scheme. The maps are in antenna temperature and, as described in detail below, include thermal dust, free-free and synchrotron emissions, on top of CMB fluctuations. For the CMB we assume a blackbody spectrum with  $T_{\text{CMB}} = 2.726$  K, so that fluctuations in antenna temperature,  $\delta T_{\text{A,CMB}}$  are related to brightness temperature fluctuations  $\delta T_{\text{CMB}}$  by:

$$\delta T_{\text{A,CMB}}(\nu) = \frac{x^2 e^x}{(e^x - 1)^2} \delta T_{\text{CMB}}, \quad (24)$$

where  $x = h\nu/kT_{\text{CMB}}$ . We have adopted brightness temperature fluctuations,  $\delta T_{\text{CMB}}$ , corresponding to a flat  $\Lambda$ CDM cosmology with  $\Omega_{\text{CDM}} = 0.35$ ,  $\Omega_b = 0.05$ ,  $\Omega_\Lambda = 0.6$  and  $h = 0.65$ , three massless neutrino families and an initial scale-invariant Gaussian spectrum. Galactic foreground emissions are described in detail below.

The CMB and foreground maps are then summed up together with simulated white noise maps, generated by assuming the rms noise fluctuation level expected for the *Planck* channels (see Table 5). The simulated skies can be seen in Fig. 2. Given our sky composition, three cases exploiting three subsets of *Planck* frequency channels are considered. The first case (case 1) makes use of the two lowest frequency channels (30 and 44 GHz) assuming a mixture of CMB plus the dominant diffuse Galactic foreground, which is assumed to be the synchrotron emission. Note

**Table 5.** Assumed parameters for the *Planck* channels considered here. Sensitivities, for a 14 months mission, are in antenna temperature.

|                              | LFI  |      |      | HFI |     |     |     |
|------------------------------|------|------|------|-----|-----|-----|-----|
| Frequency (GHz)              | 30   | 44   | 100  | 100 | 143 | 217 | 353 |
| Angular resolution (arcmin)  | 33.6 | 22.9 | 10   | 9.2 | 7.1 | 5.0 | 5.0 |
| $\Delta T$ ( $\mu\text{K}$ ) | 5.1  | 7.8  | 12.4 | 4.7 | 4.0 | 3.5 | 3.2 |

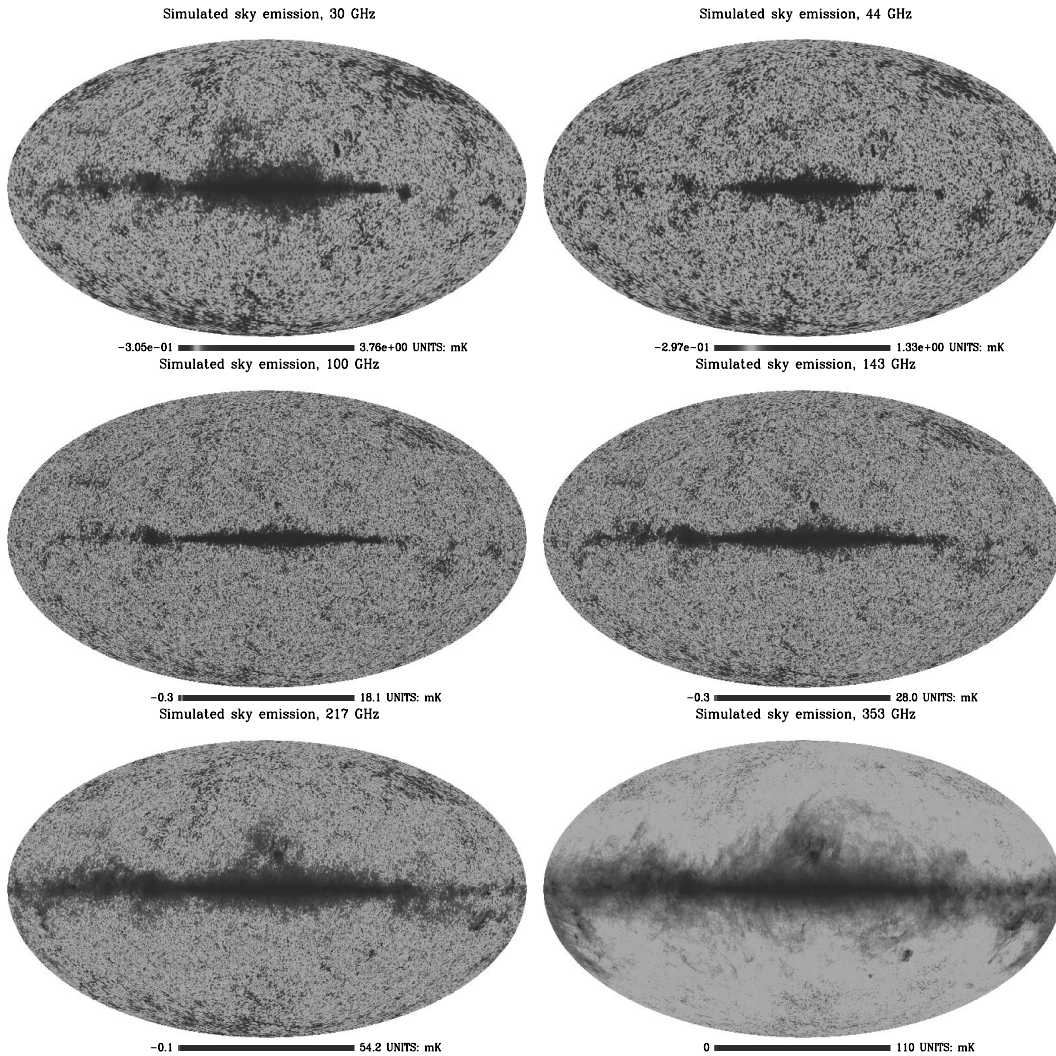

**Figure 2.** Simulated skies at several *Planck* frequencies. Signals have been plotted in a non-linear scale to emphasize high Galactic latitude structures.

that a significant contribution from Galactic free–free should be present in the real sky, at least at low Galactic latitudes, but a good template for it is still missing. For the moment, we neglect it. We apply FASTICA to all-sky maps as well as to regions of high ( $|b| > 20^\circ$ ) and low ( $|b| < 20^\circ$ ) Galactic latitude.

**Table 6.** Percentage errors on FASTICA frequency scaling reconstruction.

| Considered frequencies (GHz) | 30/44 | 100/143 | 143/217 | 217/353 |
|------------------------------|-------|---------|---------|---------|
| Case 1, all-sky              |       |         |         |         |
| CMB                          | 1     |         |         |         |
| Synchrotron                  | 3     |         |         |         |
| Case 1, $ b  > 20^\circ$     |       |         |         |         |
| CMB                          | 1     |         |         |         |
| Synchrotron                  | 0.3   |         |         |         |
| Case 1, $ b  < 20^\circ$     |       |         |         |         |
| CMB                          | 2     |         |         |         |
| Synchrotron                  | 3     |         |         |         |
| Case 2, all-sky              |       |         |         |         |
| CMB                          |       | 1       | 0.6     |         |
| Thermal component            |       | 0.4     | 0.2     |         |
| Synchrotron                  |       | 75      | 84      |         |
| Case 3, all-sky              |       |         |         |         |
| CMB                          |       |         |         | 46      |
| Thermal component            |       |         |         | 0.3     |
| Case 3, $ b  > 20^\circ$     |       |         |         |         |
| CMB                          |       |         |         | 12      |
| Thermal component            |       |         |         | 0.7     |
| Case 3, $ b  < 20^\circ$     |       |         |         |         |
| CMB                          |       |         |         | 64      |
| Thermal component            |       |         |         | 0.03    |

The second application (case 2) is more CMB oriented: it refers to the *Planck* ‘cosmological’ channels at 100, 143 and 217 GHz, where foregrounds are at a level comparable with noise; in this case, we apply FASTICA only to all-sky maps.

The third case (case 3) again considers two signals and two channels, but we move to higher frequencies, 217 and 353 GHz, where the CMB and our thermal Galactic component, almost coincident with dust, dominate over synchrotron, which was neglected. Again we apply FASTICA to all-sky maps, to the region  $|b| < 20^\circ$  and to the complementary region at high Galactic latitudes.

Before we go to the results, let us describe briefly the methodology used. Simulated maps were originally produced with pixels of size 3.5 arcmin, corresponding to  $N_{\text{side}} = 1024$  in the HEALPix pixelization scheme, and such high-resolution maps should be taken as ‘reference’ skies. However, we can note from Table 5 that the highest frequency channels have a 5-arcmin resolution, which in principle requires a smaller pixel size to Nyquist sample the beamwidth. As we are neglecting the astrophysical signals relevant on the smallest scales (such as extragalactic point sources) in this preliminary study, we restrict our analysis to multipoles  $\ell \lesssim 2000$ , for which pixels of 3.5 arcmin are enough.

The reference maps have been smoothed with the appropriate FWHM of *Planck* channels, and the corresponding instrumental noise was added. Due to Assumption 3 in Section 2, the FASTICA algorithm requires input maps that have the same angular resolution. This situation has been achieved by reducing, for each case considered, the effective working angular resolution  $FWHM_{\text{work}}$  to the worst one. This implies an extra-smoothing of the observed (signal + noise) maps having  $FWHM < FWHM_{\text{work}}$ . It is clear that FASTICA can work with the full set of frequency maps at the same time after they have been degraded to the effective angular resolution  $FWHM_{\text{work}}$ . However, for studying the FASTICA

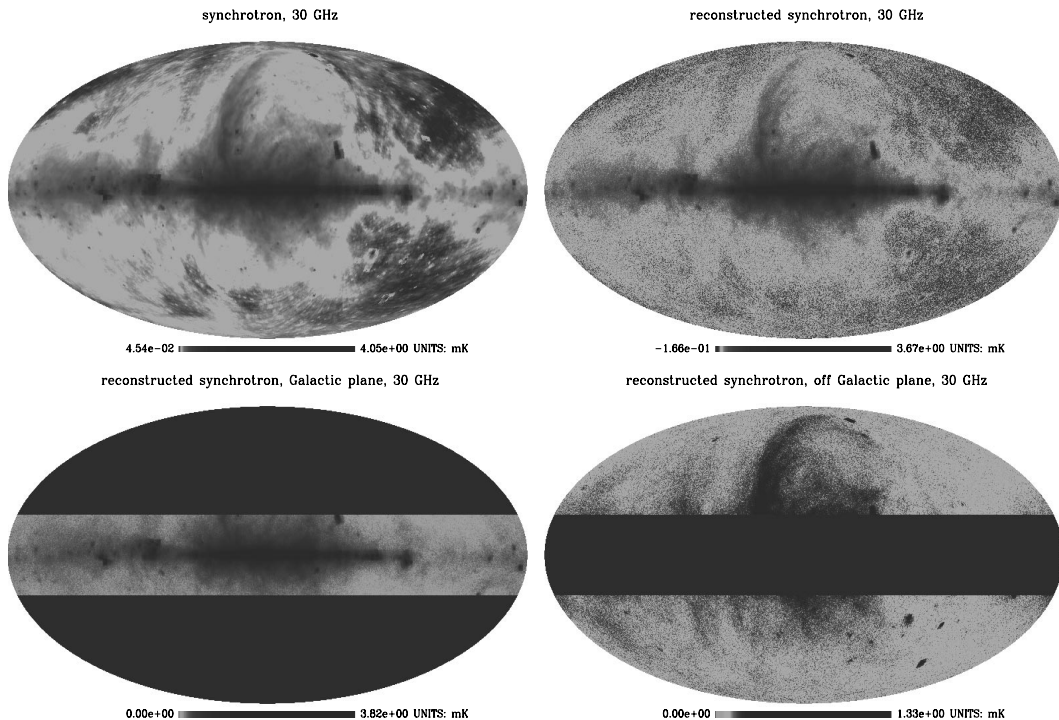

**Figure 3.** Input (top-left) and output synchrotron maps for case 1, at 30 GHz. Maps have been plotted in a non-linear scale to emphasize high Galactic latitude features.



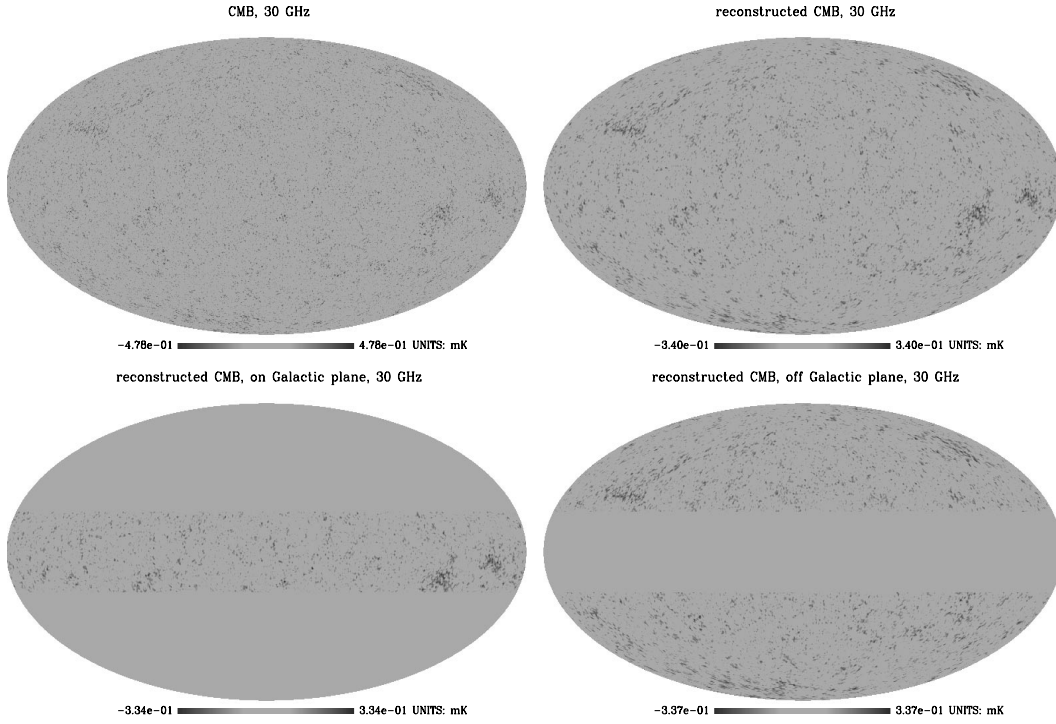

**Figure 4.** Input (top-left) and output CMB maps for case 1, at 30 GHz.

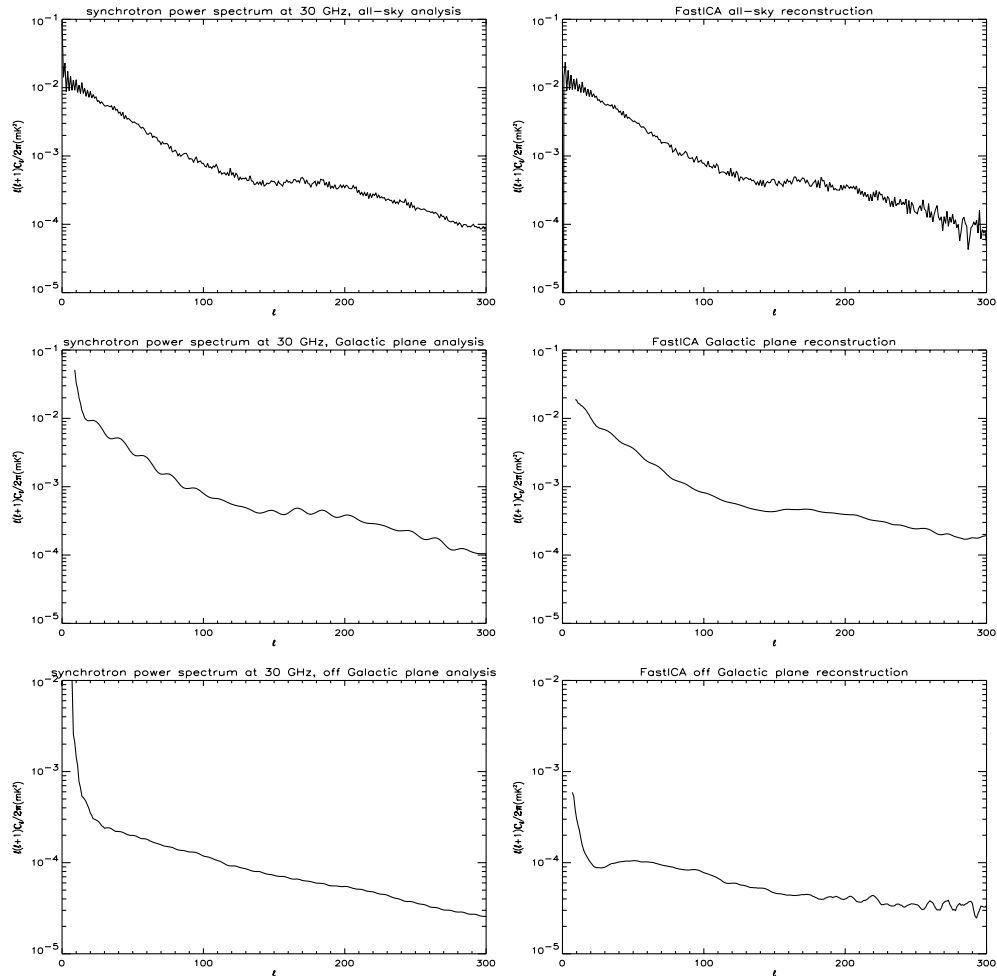

**Figure 5.** Input (left) and output (right) synchrotron angular power spectra for case 1, at 30 GHz. From top to bottom we plotted all-sky, low and high Galactic latitude FASTICA results, respectively.

capabilities in component separation and the goodness of reconstruction up to the highest multipole possible, we consider the three cases described before, which exploit three different values of angular resolution. Note that the *Planck* nominal noise (where the noise is assumed to be uniformly distributed on the sky) is generally given per resolution element corresponding to beams of different size, depending on the channel. This extra-smoothing process required by FASTICA changes the noise rms with respect to the value reported in Table 5: the new rms values are used to construct the  $\Sigma$  matrix in equation (11). Simulations on cases 2 and 3 have been performed maintaining  $N_{\text{side}} = 1024$ , while in case 1 we worked with  $N_{\text{side}} = 256$  because of the smaller angular resolution of the lowest *Planck* channels.

We quantify the quality of FASTICA outputs with reference to the percentage errors on frequency scaling recovery, on normalization, and on the angular power spectrum. For each application we estimated the relative error on the scaling reconstruction between nearby frequencies, by comparing the ratios of the  $\mathbf{W}^{-1}$  matrix elements in equation (15) with their input values. The results, for all the cases, are shown in Table 6. The normalization allows us to measure in some detail how the noise affects the separation matrix, since as we have seen in Section 2, equation (14), the normalization of the FASTICA outputs to physical units involves a direct product of an element of the inverted separation matrix by a FASTICA output. The angular power spectrum of each physical component is

estimated using the FASTICA output maps as follows. At each frequency, and for each signal, the observed  $C_\ell$  are the sum of signal and noise contributions:

$$C_\ell^{\text{map}} = C_\ell W(\ell) + C_\ell^{\text{noise}},$$

where the filter function

$$W(\ell) = \exp[-\ell(\ell + 1)(FWHM/\text{rad})^2/(8 \log 2)] \quad (25)$$

describes the effect of the beam shape on multipoles and  $C_\ell^{\text{noise}}$  represents the noise contamination, which is additive only if noise and signal are perfectly uncorrelated. Our guesses about the noise rms allow us to Monte Carlo simulate the  $C_\ell^{\text{noise}}$ . The power spectra of FASTICA output noisy maps, obtained with the code ANAFast (HEALPix package), should therefore be a good estimate of the quantities  $[C_\ell W(\ell) + C_\ell^{\text{noise}}]$  for the signals observed. We can invert the previous relation and estimate the power spectra of the signals, since we know  $W(\ell)$  and have a guess for  $C_\ell^{\text{noise}}$ :

$$C_\ell = \left[ \frac{C_\ell^{\text{map}} - C_\ell^{\text{noise}}}{W(\ell)} \right]. \quad (26)$$

This is the relation used in the following analysis, to evaluate the performances of FASTICA separation in terms of the angular power spectrum.

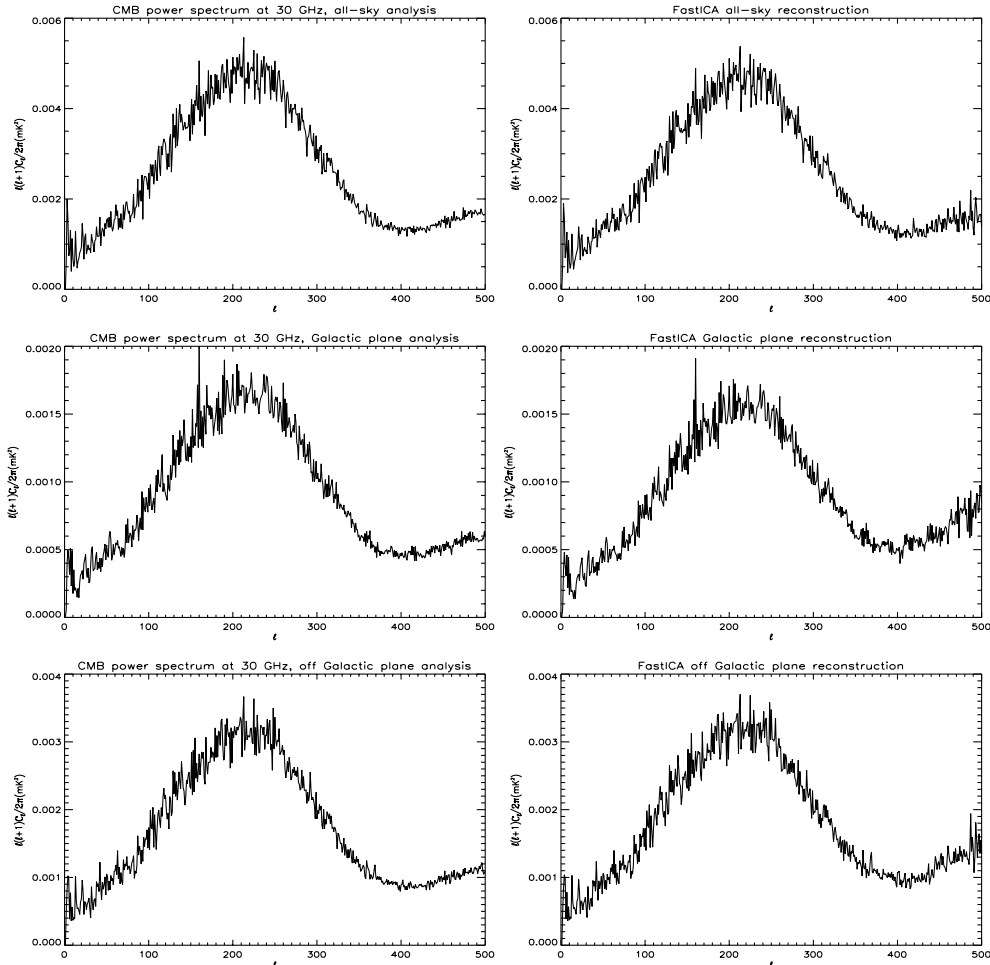

**Figure 6.** Input (left) and output (right) CMB angular power spectra for case 1, at 30 GHz. From top to bottom: all-sky, low, and high Galactic latitude FASTICA results, respectively.

### 5.1 Case 1

Components to be recovered are CMB and synchrotron which are assumed to dominate the sky emission at 30 and 44 GHz. The synchrotron emission template is the 408 MHz map of Haslam et al. (1982), extrapolated to the considered frequencies assuming a uniform spectral index  $\beta_{\text{syn}} = -2.9$ . On account of the poor resolution of the Haslam map ( $\sim 0.85^\circ$ ) we artificially add Gaussian small-scale fluctuations with a power spectrum  $P_\ell \propto \ell^{-3}$ .

As already mentioned, we have applied the FASTICA algorithm to the whole sky, as well as to regions around the Galactic plane ( $|b| < 20^\circ$ ) and of high Galactic latitude ( $|b| > 20^\circ$ ). The 44-GHz noisy map was smoothed to a  $FWHM_{\text{work}} = 33.6$  arcmin, corresponding to the *Planck* resolution at 30 GHz. We finally re-gridded the maps with pixels of size  $\sim 14$  arcmin, (corresponding to  $N_{\text{side}} = 256$ ), which is enough to Nyquist sample the working beam size. Figs 3 and 4 show input versus output maps, while Figs 5 and 6 give the corresponding power spectra, showing, from top to bottom, the all-sky, high and low Galactic latitude results, respectively.

Synchrotron is reconstructed remarkably well over whole sky. The residual noise shows up in the high- $\ell$  tail of the reconstructed

spectrum. The normalization is also correctly recovered. The reconstruction for regions at low and high Galactic latitudes is still good, although it does not reach the quality of the all-sky analysis. Note however that the synchrotron map has essentially no power above  $\ell \approx 100$ ; this is the reason why we only plotted this signal up to multipoles  $\ell \approx 300$  corresponding to scales slightly below  $1^\circ$ . When the angular power spectrum of this signal is estimated for a fraction of the sky, oscillations are found, which propagate down to very low  $\ell$ s. Such oscillations have been smoothed by averaging over intervals  $\Delta\ell = 10$ . However FASTICA has recovered the correct normalization of the reconstructed synchrotron, as can be seen by looking at the scales in Figs 3 and 5.

The CMB is reconstructed well on all the scales down to the adopted resolution scale, which corresponds to  $\ell \approx 500$ . Also the normalization was recovered quite correctly. The rise in the recovered spectra at  $\ell \approx 500$  is because the maps have been smoothed and then gridded before separation, as we explained above: this introduces extra power on the spectrum, at multipoles corresponding to the pixel size, which is enhanced by dividing by the beam window function as in equation (26).

The percentage errors on the reconstructed frequency scalings, reported in Table 6, are at the per cent level for both components.

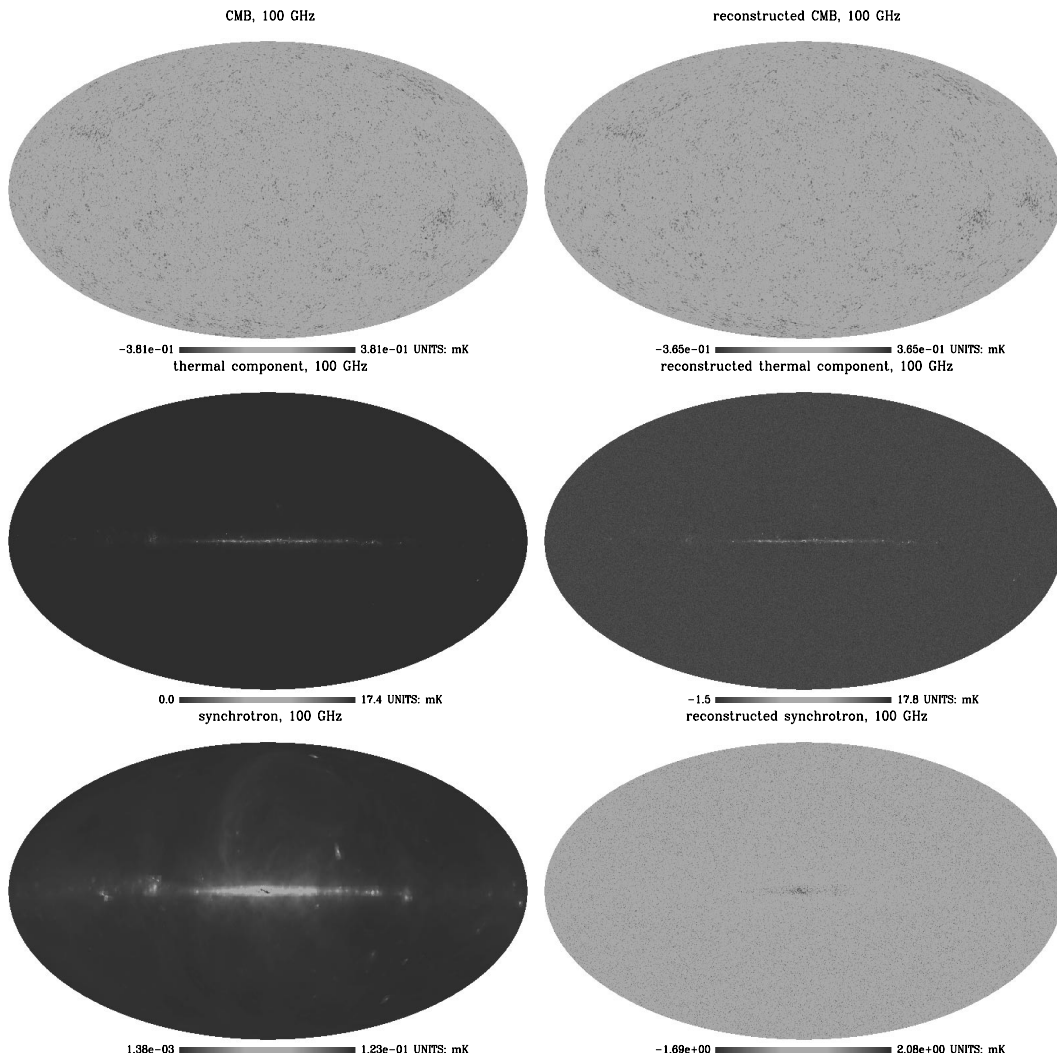

Figure 7. Input (left-hand) and output (right-hand) maps for case 2, at 100 GHz.

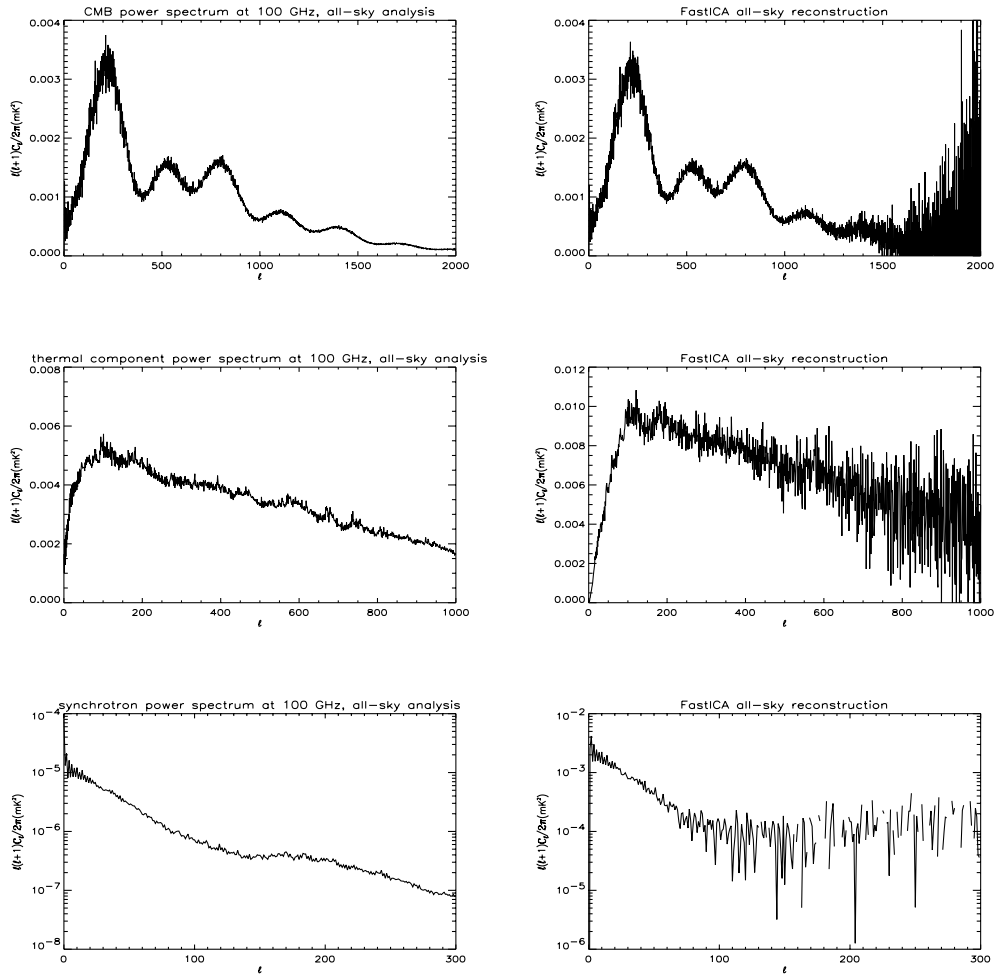

**Figure 8.** Input (left-hand) and output (right-hand) angular power spectra of the CMB, of the thermal component, and of synchrotron emission for case 2, at 100 GHz.

**Table 7.** Skewness and kurtosis of CMB, thermal component and synchrotron templates.

| Component   | Skewness | Kurtosis |
|-------------|----------|----------|
| CMB         | 0.014    | 0.087    |
| Thermal     | 51.7692  | 5098.16  |
| Synchrotron | 7.717    | 80.693   |

## 5.2 Case 2

In this frequency range (100–217 GHz) the CMB is the dominant component, except for the Galactic plane region. Our simulated skies contain a mixture of CMB, synchrotron and thermal emission, described below. The dust emission templates have been obtained by extrapolating the maps by Schlegel et al. (1998), which combine *IRAS* and *DIRBE* data, assuming a greybody spectrum (expressed in antenna temperature),

$$f_{\text{dust}}(\nu) \propto \frac{\tilde{\nu}^{\beta+1}}{e^{\tilde{\nu}} - 1}, \quad \tilde{\nu} = \frac{h\nu}{kT_{\text{dust}}} \quad (27)$$

with uniform temperature  $T_{\text{dust}} = 18$  K and emissivity  $\beta = 2$ .

Unfortunately, no maps of free–free emission are available at the moment, although an all-sky map of  $H_{\alpha}$  emission (which is

known to be a good tracer of free–free emission) will be available in a couple of years (Reynolds & Haffner 2000). On the other hand, at  $\lesssim 100$  GHz, free–free emission may exceed the dust emission component. In order to simulate the free–free contribution we assume, somewhat arbitrarily, that it is perfectly correlated with the dust itself, i.e. that it has the same spatial distribution. Its antenna temperature scales with frequency as  $T_{\text{A,ff}} \propto \nu^{-\beta_{\text{ff}}}$ , with  $\beta_{\text{ff}} = -2.1$ . The relative amplitude of dust and free–free emission is assumed to be a factor of 3 at 100 GHz (De Zotti et al. 1999). Thus, for the FASTICA analysis, free–free and dust emission effectively behave as a single component, referred to, in the following, as the ‘thermal’ component which has a spectrum described by

$$f_{\text{thermal}}(\nu) = \frac{1}{3} \left( \frac{\nu}{100 \text{ GHz}} \right)^{\beta_{\text{ff}}} + \frac{f_{\text{dust}}(\nu)}{f_{\text{dust}}(100 \text{ GHz})}. \quad (28)$$

The Galactic signals are well below the noise at medium and high Galactic latitudes so that no reconstruction is possible there at these frequencies. Therefore we have restricted the analysis to all-sky maps. The smoothing of the noisy sky maps has been performed with an FWHM of 10 arcmin, and we have used  $N_{\text{side}} = 1024$  (3.5-arcmin pixels). Figs 7 and 8 show the input (left-hand) and output (right-hand) maps and power spectra, respectively, at 100 GHz.

The CMB power spectrum is reconstructed up to  $\ell \approx 1500$  with the correct normalization. On the contrary, thermal emission and

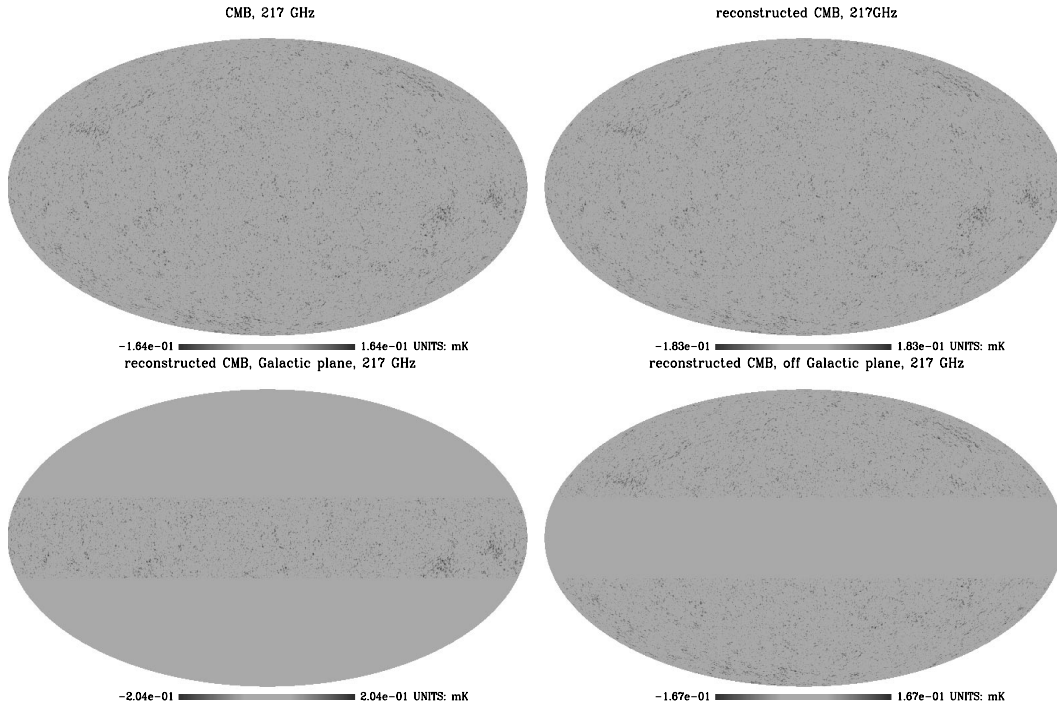

Figure 9. Input (top-left) and output CMB maps for case 3.

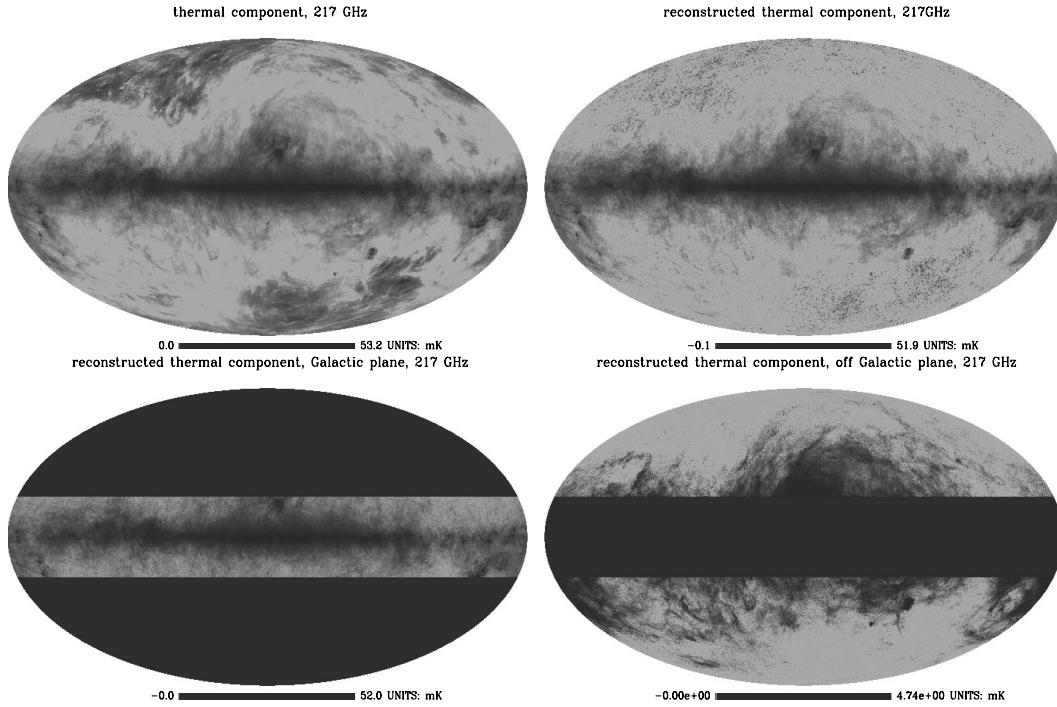

Figure 10. Input (top-left) and output thermal emission maps for case 3, at 217 GHz.

synchrotron power spectra are much more affected by noise. The power spectrum of thermal emission is quite well reconstructed up to  $\ell \approx 600$ , but its normalization is overestimated by a factor  $\approx 1.8$ . The shape of the synchrotron power spectrum is recovered up to  $\ell \approx 100$ , but its normalization was lost.

The reason of the bad quality of the synchrotron reconstruction resides in the weakness of this component at these frequencies, with respect to noise, and in the poor statistics

contained in the synchrotron template we use, as we already stressed.

However, it is remarkable that FASTICA could separate, to some extent, thermal and synchrotron emissions, despite their low signal-to-noise ratio and the correlation in their spatial distributions (both are maximum on the Galactic plane). The latter point illustrates the fact that the statistical independence required for FASTICA to work is not so much related to the spatial pattern of

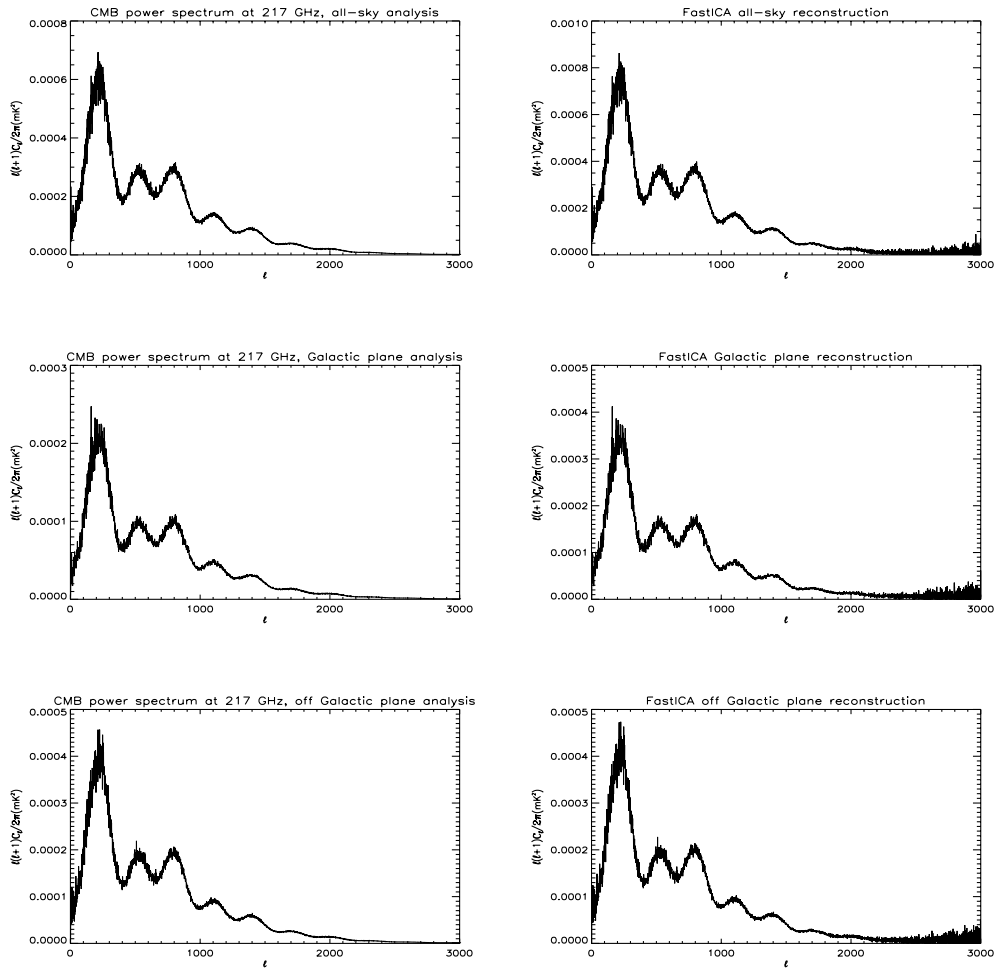

**Figure 11.** Input (left-hand) and output (right-hand) CMB angular power spectra for case 3, at 217 GHz. From top to bottom: all-sky, low and high Galactic latitude results, respectively.

the components to be separated but, rather, to their distribution functions. The templates we have adopted for thermal and synchrotron emissions do have quite different distribution functions, as illustrated by Table 7, giving their skewness and kurtosis. This makes FASTICA able to perform some separation of them. As we can see from Table 6, frequency scalings are recovered very well, at the percent level, for the CMB and thermal components, while the error is considerably larger for synchrotron, which is the weakest component in this case.

### 5.3 Case 3

For this analysis, we selected two channels, 217 and 353 GHz, and two components, CMB and thermal emission which, at these frequencies, is dominated by dust. Maps with  $N_{\text{side}} = 1024$  have been smoothed with a FWHM of 5 arcmin. As in case 1, we have made separate analyses for the whole sky, and for the high and low Galactic latitude regions. The average signal-to-noise ratio for the dust is 190 over the whole sky, 246 for  $|b| < 20^\circ$ , and 6.6 at high Galactic latitude; for the CMB it is  $\sim 5.7$ .

The results are reported in Figs 9, 10, 11 and 12, referring to 217 GHz. The shapes of the power spectra of both signals are reconstructed very well up to  $l \approx 2000$  in all cases shown.

The amplitude of the power spectrum of thermal emission is accurately recovered in all cases, while in the case of the CMB this

happens only at high Galactic latitudes, where the two components are comparable. As shown by Table 6, the frequency scaling of thermal emission is recovered to a fraction of 1 per cent, while for the CMB the error is much larger.

## 6 DISCUSSION AND CONCLUSION

We have presented the first application of a new, computationally fast, technique for separation of astrophysical components, based on Independent Component Analysis concepts, FASTICA. The technique has been applied both to toy models, useful to highlight some of its key properties, and to simulated all-sky maps, with reference to the forthcoming *Planck* mission (Mandolesi et al. 1998; Puget et al. 1998).

We have achieved a considerable improvement over the previous application of ICA-type algorithms to astrophysical component separation (see Baccigalupi et al. 2000). First of all, the method is considerably faster: processing of all-sky maps with  $\sim 10^7$  sky pixels (pixel size of 3.5 arcmin) took approximately 10 min on a Pentium III 600 MHz computer. This is much less than required by any existing non-blind separation methods such as Maximum Entropy, which takes 6 h on 30 processors at equivalent resolutions (Stolyarov et al. 2001). However, it is worth noting that MEMs (and also Wiener filters) are much slower than FASTICA as

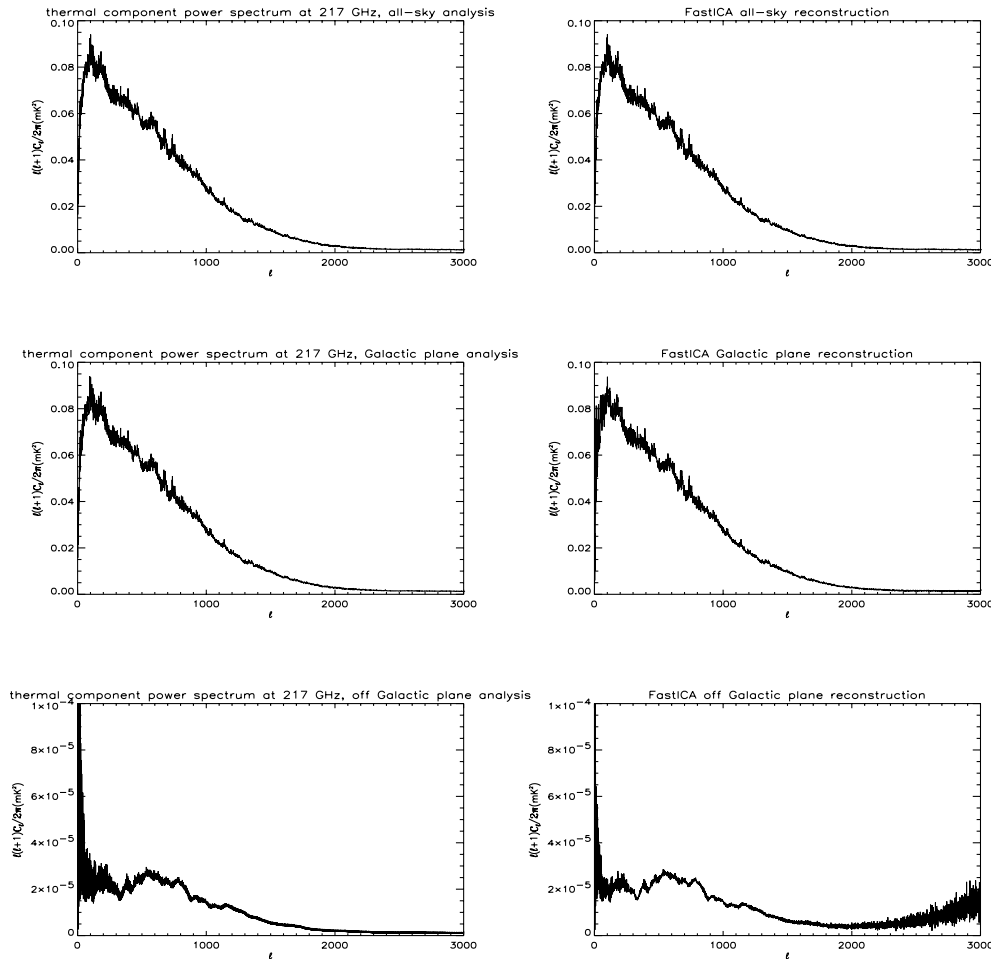

**Figure 12.** Input (left-hand) and output (right-hand) angular power spectra of the thermal component for case 3 at 217 GHz. From top to bottom: all-sky, low, and high Galactic latitude results, respectively.

they perform a regularized inversion in the Fourier (harmonic) space.

Secondly, we have shown that FASTICA works in the presence of instrumental noise, although under the simplifying assumption that it is white and uniformly distributed. Thirdly, the algorithm was successfully applied to both all-sky maps and limited portions of the sky. Using the full all sky maps obviously minimizes the sample variance. On the other hand, we have shown that the foreground removal improves if we cut regions (around the Galactic plane) where their distribution is highly non-uniform.

Furthermore, we extended the formalism of the separation algorithm in order to obtain the normalization constants to convert FASTICA output maps in physical units. We found that the accuracy on this calibration is limited only by the instrumental noise. The same noise effect limits the frequency scaling reconstruction. On the other hand, FASTICA still requires that all the input maps have the same angular resolution.

We applied FASTICA to different combinations of *Planck* frequency channels, namely 30, 44, 100, 143, 217 and 353 GHz, containing a mixture of CMB, synchrotron and thermal emissions, the latter comprising free-free plus thermal dust emission. The nominal average instrumental noise levels and angular resolutions of *Planck* have been adopted.

With all these ingredients, FASTICA is able to obtain an excellent (well-calibrated) reconstruction of all these components. The

angular power spectra of both CMB and thermal emissions can be accurately reconstructed up to multipoles  $\ell \approx 2000$ . Synchrotron is also recovered on all scales where our template has significant power, i.e. up to  $\ell \approx 300$ . Frequency scalings and normalization are recovered with up to better than 1 per cent precision.

Nevertheless, a lot of work still has to be done to assess the real capabilities of this and other component separation algorithms for CMB experiments. Here we list our main simplifying assumptions, which we have to relax in future.

The spectral properties of synchrotron and dust emissions have been assumed to be constant over the sky, although it is known that both the synchrotron spectral index and the dust temperature vary from place to place. The spatial pattern of free-free emission was assumed to follow that of dust, which is certainly over-simplistic. Spinning dust emission was not taken into account. We also neglected extragalactic sources, which are expected to contribute significantly on all *Planck* channels, as well as the thermal and kinetic Sunyaev-Zeldovich effect. Very efficient point-source extraction techniques are being extensively studied (Cayón et al. 2000; Vielva et al. 2001a) and combined with a MEM approach (Vielva et al. 2001b). This last application is very promising, as it improves the separation with respect to the MEM technique alone and produces point source catalogues which are more complete and accurate. A similar joint analysis exploiting FASTICA as a separation algorithm is ongoing.

Finally, the instrumental noise is not uniform across the sky, as assumed here, but has a complex pattern determined by the scanning strategy adopted. This is an important issue for CMB data analysis in general and may have an impact on FASTICA results. Also the instrumental beam is not perfectly circularly symmetric, etc.

Despite all these still unaddressed issues, we demonstrated that FASTICA is a very promising technique because of three main features: (i) the good separation achieved on our simulated maps, which contained noise at the *Planck* nominal level, (ii) the high computational speed, and (iii) the extreme flexibility of the code, which is able to work on all-sky maps as well as on arbitrarily shaped sky regions in a straightforward way. We recall also that FASTICA is a blind separation algorithm, able to estimate not only independent components present in the data, but also their frequency scalings.

## ACKNOWLEDGMENTS

We wish to warmly thank all the *Planck* Low Frequency Instrument Data Processing Center for having supported this work. The HEALPix package use is acknowledged. We gratefully acknowledge financial support from MURST and ASI.

## REFERENCES

- Amari S., Chichocki A., 1998, *Proc. IEEE*, 86, 2026  
 Baccigalupi C. et al., 2000, *MNRAS*, 318, 767  
 Cardoso J. F., 1998, *Proc. IEEE*, 86, 2009  
 Cayón L. et al., 2000, *MNRAS*, 315, 757  
 Comon P., 1994, *Signal Processing*, 36, 287  
 de Bernardis P. et al., 2002, *ApJ*, 564, 559  
 de Oliveira-Costa A., Tegmark M., 1999, *ASP Conf. Ser. Vol. 181, Microwave Foregrounds*. Astron. Soc. Pac., San Francisco  
 De Zotti G., Toffolatti L., Argüeso F., Davies R. D., Mazzotta P., Partridge R. B., Smoot G. F., Vittorio N., 1999, in Maiani L., Melchiorri F., Vittorio N., eds, *AIP Conf. Proc. 476, 3 K Cosmology*. Am. Inst. Phys., New York, p. 204  
 Górski K. M., Hivon E., Wandelt B. D., 1998, in Banday A. J., Sheth R. K., Da Costa L., eds, *Proc. MPA/ESO Conference on Evolution of Large-Scale Structure: from Recombination to Garching*. PrintPartners Ipskamp, Enschede, p. 37  
 Górski K. M., Wandelt B. D., Hansen F. K., Hivon E., Banday A. J., 1999, preprint (astro-ph/9905275)  
 Haslam C. G. T., Stoffel H., Salter C. J., Wilson W. E., 1982, *A&AS*, 47, 1  
 Hobson M. P., Jones A. W., Lasenby A. N., Bouchet F., 1998, *MNRAS*, 300, 1  
 Hobson M. P., Barreiro R. B., Toffolatti L., Lasenby A. N., 1999, *MNRAS*, 309, 125  
 Hyvärinen A., Oja E., 1997, *Neural Computation*, 9, 1483  
 Hyvärinen A., 1999, *IEEE Signal Processing Lett.*, 6, 145  
 Hyvärinen A., Oja E., 2000, *Neural Networks*, 13, 411  
 Mandolesi N. et al., 1998, in a proposal submitted to ESA, *Planck Low Frequency Instrument*  
 Prunet S., Teyssier R., Scully S. T., Bouchet F. R., Gispert R., 2001, *A&A*, 373, L13  
 Puget J.-L. et al., 1998, in a proposal submitted to ESA, *High Frequency Instrument for the Planck mission*  
 Reynolds R. J., Haffner L. M., 2000, *Proc. IAU Symp. 201*, in press (astro-ph/0010618)  
 Schlegel D. J., Finkbeiner D. P., Davies M., 1998, *ApJ*, 500, 525  
 Stolyarov V., Hobson M. P., Ashdown M. A. J., Lasenby A. N., 2001, preprint (astro-ph/0105432)  
 Tenorio L., Jaffe A. H., Hanany S., Lineweaver C. H., 1999, *MNRAS*, 310, 823  
 Vielva P., Martínez-González E., Cayón L., Diego J. M., Sanz J. L., Toffolatti L., 2001a, *MNRAS*, 326, 181  
 Vielva P., Barreiro R. B., Hobson M. P., Martínez-González E., Lasenby A. N., Sanz J. L., Toffolatti L., 2001b, *MNRAS*, 328, 1  
 Wright E. L., 1999, *New Astron. Rev.*, 43, 257

This paper has been typeset from a  $\text{\TeX/L\AA\TeX}$  file prepared by the author.
